# Supplementary material for: Multi-component solvent-free cascade reaction of 2-cyanoacetamides: regioselective synthesis of pyridin-2-ones bearing quaternary centers
Source: Royal Society of Chemistry journal article supplement (doi:10.1039/c9gc03692j), 2019-11-25

## TOC Graphic

# Multi-component solvent-free cascade reaction of 2-cyanoacetamides: regioselective synthesis of pyridin-2-ones bearing quaternary centers

Lingbin Kong,<sup>‡</sup> Rong Huang,<sup>‡</sup> Haodan He, Yunxiang Fan, Jun Lin\* and Shengjiao Yan\*

A novel protocol has been constructed for the synthesis of pyridin-2-ones (**2–5**) via a solvent-free cascade reaction of 2-cyanoacetamides **1**.

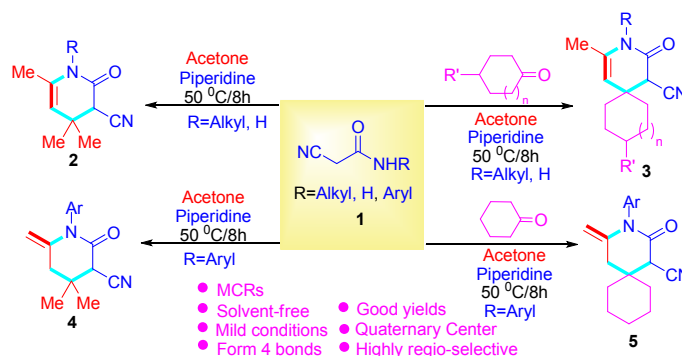

Supplement: c9gc03692j2.pdf [file c9gc03692j2.pdf]
